# Supplementary material for: Facile synthesis of a mesoporous Co3O4network for Li-storage via thermal decomposition of an amorphous metal complex
Source: Royal Society of Chemistry journal article supplement (doi:10.1039/c4nr01806k), 2014-01-01
Supplement: c4nr01806k1.pdf [file c4nr01806k1.pdf]

## Electronic Supplementary Information for

### Facile synthesis of a mesoporous Co<sub>3</sub>O<sub>4</sub> network for Li-storage via thermal decomposition of an amorphous metal-complex

Wei Wen,<sup>a</sup> Jin-Ming Wu<sup>\*a</sup> and Min-Hua Cao<sup>b</sup>

<sup>a</sup> *State Key Laboratory of Silicon Materials, Key Laboratory of Advanced Materials and Applications for Batteries of Zhejiang Province and Department of Materials Science and Engineering, Zhejiang University, Hangzhou 310027, P. R. China. Fax: +86 0571 87953115; E-mail: msewjw@zju.edu.cn*

<sup>b</sup> *Key Laboratory of Cluster Science, Ministry of Education of China and Department of Chemistry, Beijing Institute of Technology, Beijing 100081, P. R. China.*

#### Experimental section

##### Synthesis

**Porous ZnCo<sub>2</sub>O<sub>4</sub>:** 0.833 g Co(NO<sub>3</sub>)<sub>2</sub>·6H<sub>2</sub>O, 0.426 g Zn(NO<sub>3</sub>)<sub>2</sub>·6H<sub>2</sub>O and 1.750 g glycine (C<sub>2</sub>H<sub>5</sub>NO<sub>2</sub>) were dissolved in 10 mL deionized water in a crucible to form a solution, which was then transferred to a preheated furnace maintained at 400 °C for ca. 16 min to finish the decomposition reaction, which resulted in a black foam. The as-combusted sample was then heated at 480 °C for 2 h in air at a heating rate of 5 °C min<sup>-1</sup> to achieve finally the porous ZnCo<sub>2</sub>O<sub>4</sub>.

**Porous NiO:** 1.250 Ni(NO<sub>3</sub>)<sub>2</sub>·6H<sub>2</sub>O and 1.750 g glycine (C<sub>2</sub>H<sub>5</sub>NO<sub>2</sub>) were dissolved in 10 mL deionized water in a crucible to form a solution, which was then transferred to a preheated furnace maintained at 400 °C for ca. 16 min to finish the decomposition reaction, leading to a black foam. The as-combusted sample was then heated at 550 °C for 1 h in air at a heating rate of 5 °C min<sup>-1</sup> to achieve finally the porous NiO.

##### Characterization

X-ray diffraction (XRD) measurements were conducted on a XRD-6000 diffractometer (SHIMADZU) with Cu K $\alpha$  radiation, operated at 40 kV, 40 mA ( $\lambda$  = 0.15406 nm). The powder morphology was observed using a field emission scanning electron microscopy (FE-SEM, with EDS capabilities, Hitachi S-4800, Tokyo, Japan) and a FEI-F20 transmission electron microscopy (TEM, FEI, USA) working at 200 kV. A STA-449F3 instrument (NETZSCH-Gerätebau GmbH, Germany) was used to carry out the thermogravimetric (TG) analysis of the as-combusted samples in air atmosphere at a heating rate of 5 °C min<sup>-1</sup> from room temperature to 800

°C. The Brunauer-Emmett-Teller (BET) approach using adsorption data was utilized to determine the specific surface area. The sample was degassed at 150 °C for 14 h to remove physisorbed gases prior to the measurement.

### Lithium storage test

The working electrodes were prepared by a slurry coating procedure. The slurry consisted of 80 wt. %  $\text{Co}_3\text{O}_4$  powders, 10 wt. % acetylene black, and 10 wt. % polyvinylidene fluoride (PVDF) dispersed in N-methyl pyrrolidinone (NMP), and was coated on a copper foil, which acted as a current collector. The active material ( $\text{Co}_3\text{O}_4$ ) was 0.4–0.6  $\text{mg}/\text{cm}^2$  on each electrode and the coating thickness was ca. 3.5  $\mu\text{m}$ . Electrodes with a much higher mass loading of 1.5–2.5  $\text{mg}/\text{cm}^2$  were also characterized. The film was dried at 120 °C for 12 h in vacuum. The cells were assembled in an argon-filled glove box using Li foil as a counter electrode and polypropylene (PP) film (Celgard 2300) as a separator. The electrolyte was 1 M  $\text{LiPF}_6$  in a 50:50 (w/w) mixture of ethylene carbonate (EC) and diethyl carbonate (DEC). The charge–discharge tests were conducted on a LAND 2001A system at a current density of 100  $\text{mA g}^{-1}$  and 1000  $\text{mA g}^{-1}$  between 0.005 V and 3.0 V. The cyclic voltammetry was performed on a CHI660D electrochemical workstation.

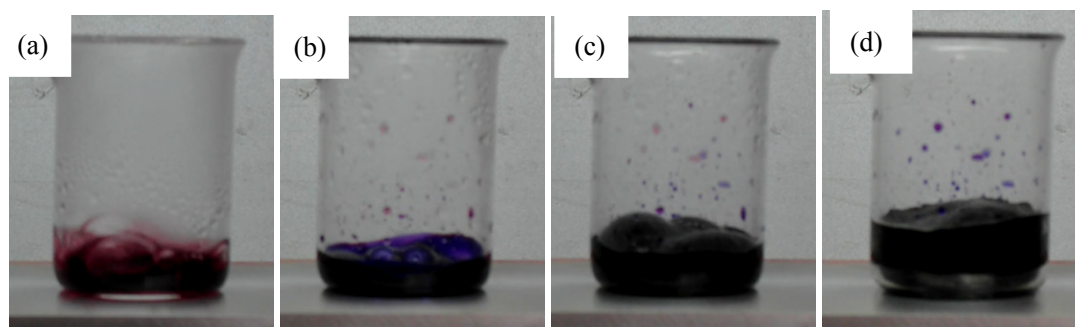

**Fig. S1** The decomposition process of the precursor solution: (a) boiling of the pink solution (0 min), (b) changing to blue and bubbling (6.0 min), (c) bubbling, decomposition and release of gases (7.0 min), and (d) the formation of the black product (13.5 min).

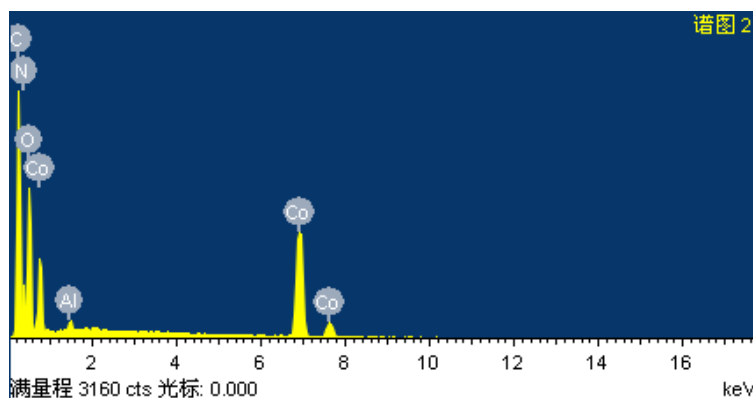

**Fig. S2** EDS spectrum of the as-synthesized cobalt-based complex. The Al element in EDS spectrum is from the SEM holder.

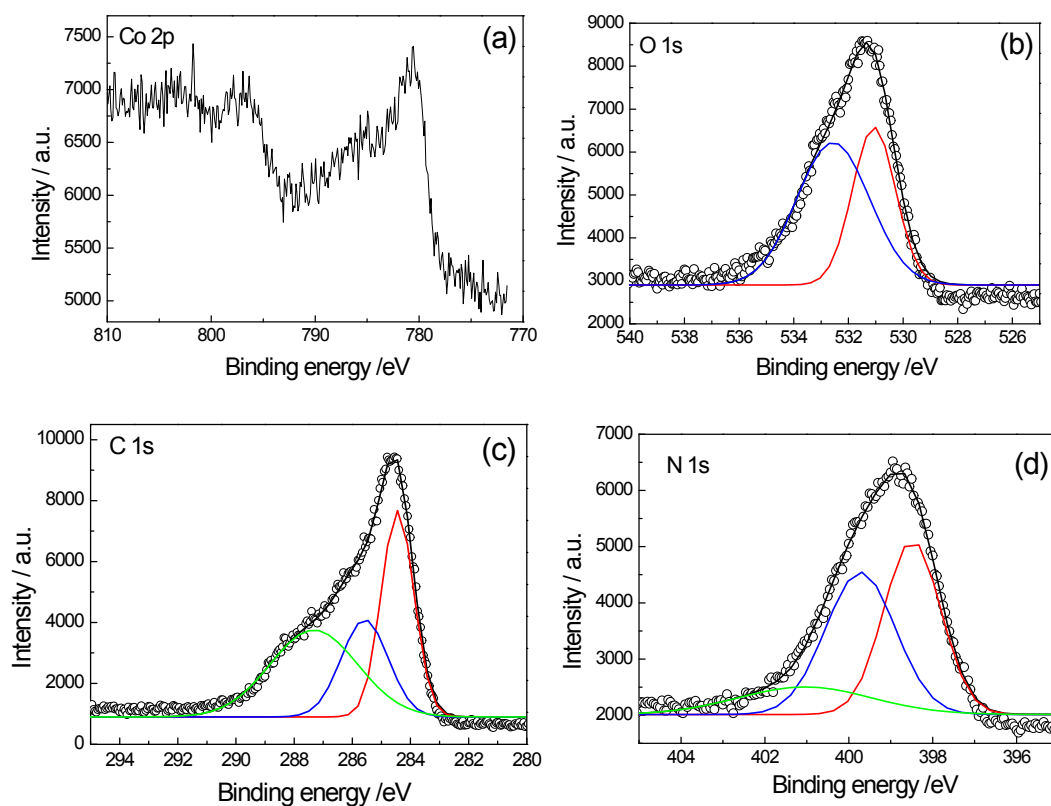

**Fig. S3** High-resolution XPS spectra of as-synthesized cobalt-based complex: (a) Co 2p, (b) O 1s, (c) C 1s, and (d) N 1s.

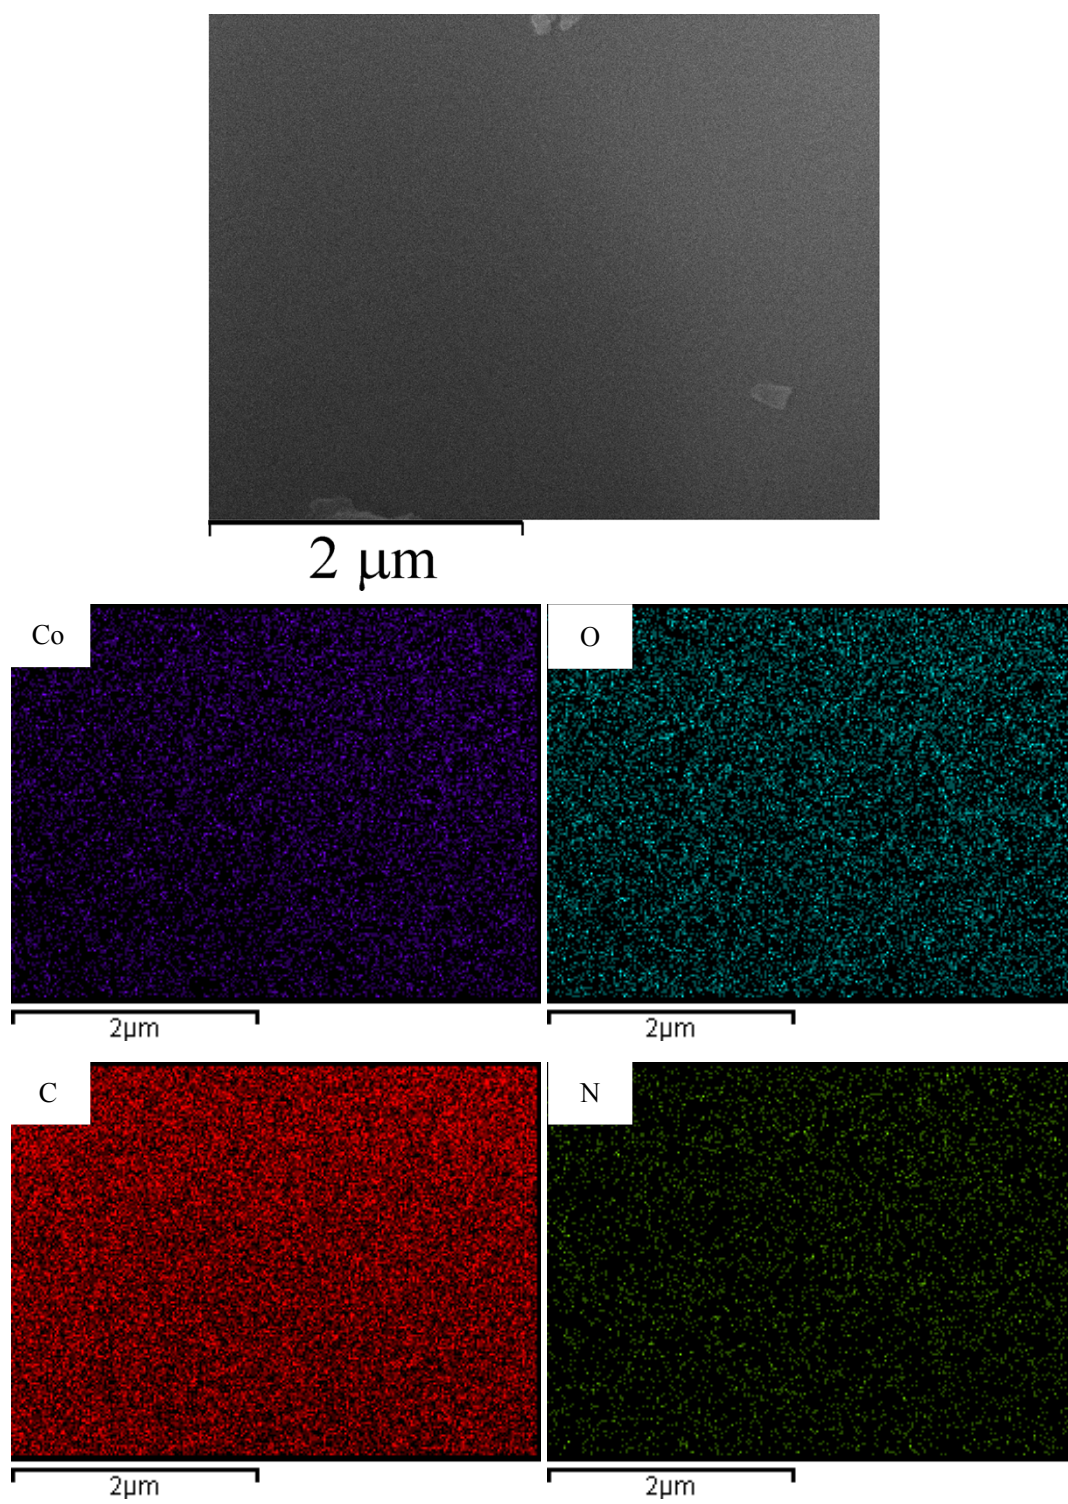

**Fig. S4** The as-synthesized cobalt-based complex and the corresponding elemental mappings of Co, O, C, and N.

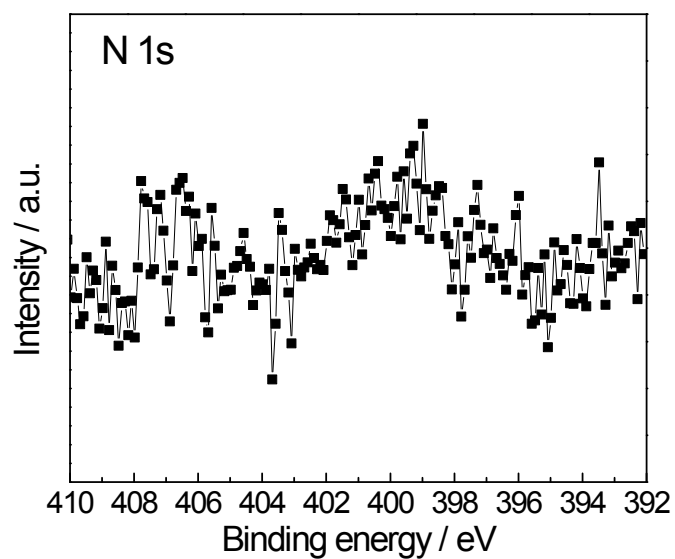

**Fig. S5** N 1s high-resolution XPS spectrum of the porous  $\text{Co}_3\text{O}_4$ .

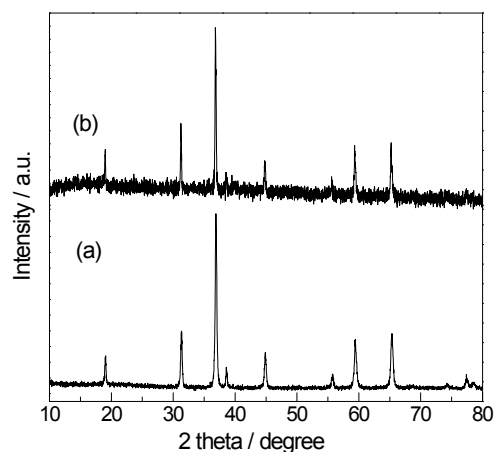

**Fig. S6** XRD patterns of the as-synthesized cobalt-based complex after calcination at different temperatures for 1 h: (a) 450 °C and (b) 550 °C.

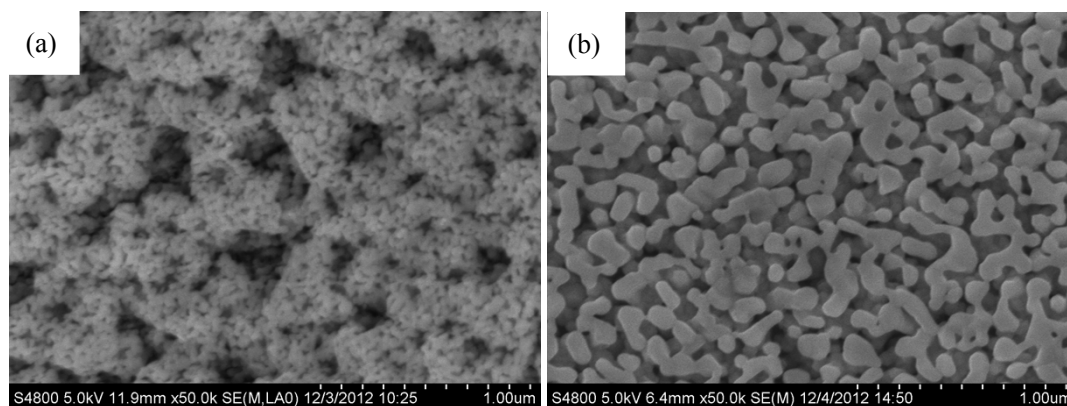

**Fig. S7** SEM images of the as-synthesized cobalt-based complex after calcination at different temperatures for 1 h: (a) 450 °C and (b) 550 °C.

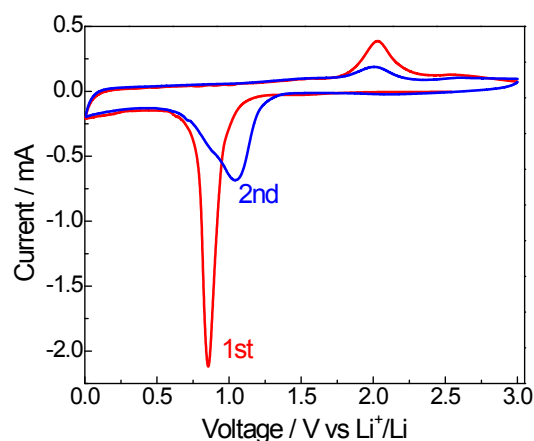

**Fig. S8** The cyclic voltammetry (CV) curves of the porous  $\text{Co}_3\text{O}_4$  scanned at a rate of  $0.1 \text{ mV s}^{-1}$ .

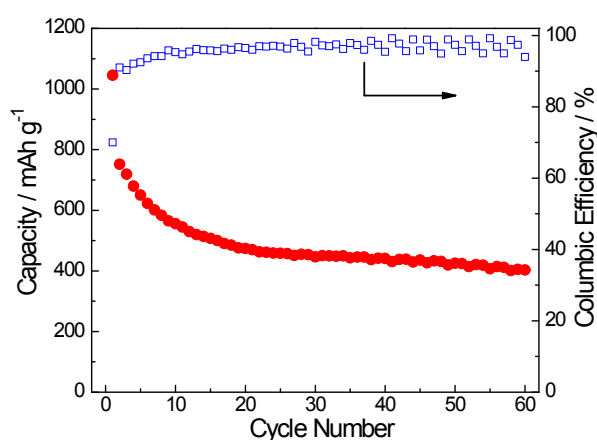

**Fig. S9** Cycling performance of commercial  $\text{Co}_3\text{O}_4$  nanoparticles (30 nm in size, Aladdin Reagent Co. Ltd., China) at a current density of  $100 \text{ mA g}^{-1}$ . The mass loading of the active material ( $\text{Co}_3\text{O}_4$ ) was ca.  $0.5 \text{ mg cm}^{-2}$ .

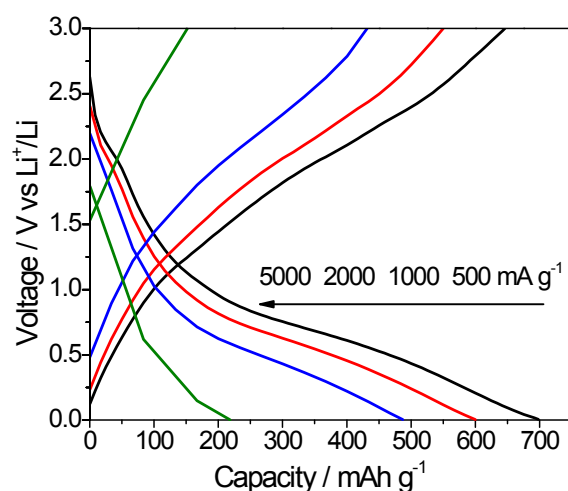

**Fig. S10** The discharge-charge profiles of the porous  $\text{Co}_3\text{O}_4$  at different current density. The rate performance is measured after the cycling test at  $1000 \text{ mA g}^{-1}$  for 390 cycles to stabilize the capacity because discharge capacity of the present porous  $\text{Co}_3\text{O}_4$  firstly decreases and then gradually increases during the cycling (Fig. 6b and 6c).

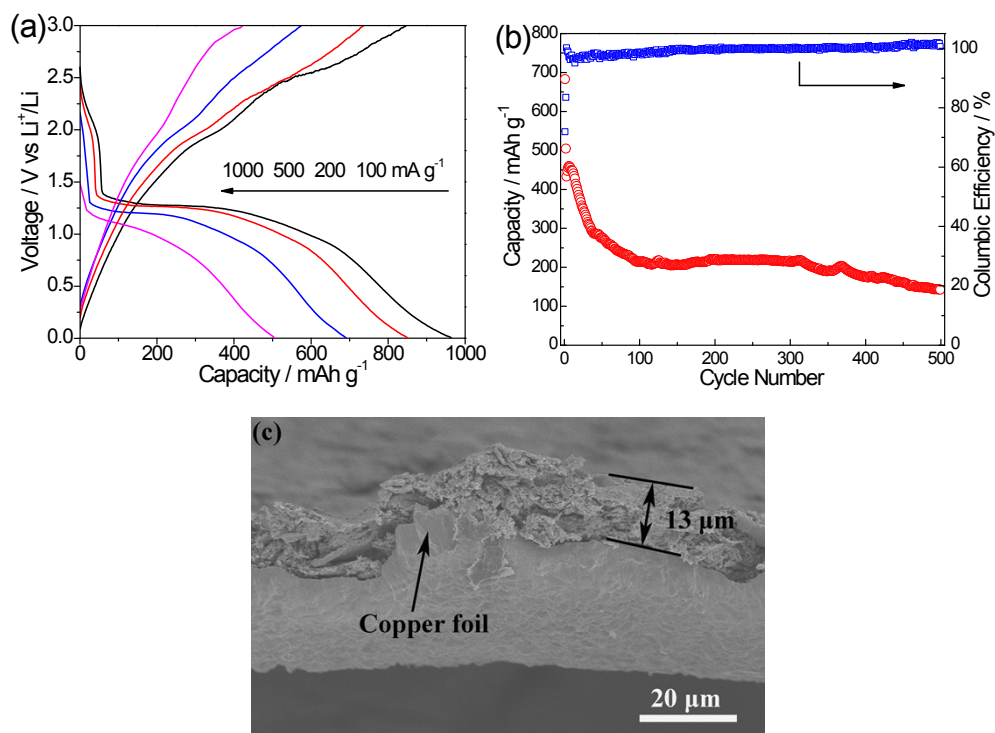

**Fig. S11** (a) The discharge-charge profiles of the porous  $\text{Co}_3\text{O}_4$  at different current density. (b) Cycling performance of the porous  $\text{Co}_3\text{O}_4$  network at a current density of 1000  $\text{mA g}^{-1}$ . (c) Cross sectional SEM image of an electrode, showing the thickness of the coating is ca. 13  $\mu\text{m}$ . The active material (porous  $\text{Co}_3\text{O}_4$ ) was 1.5–2.5  $\text{mg cm}^{-2}$  on each electrode.

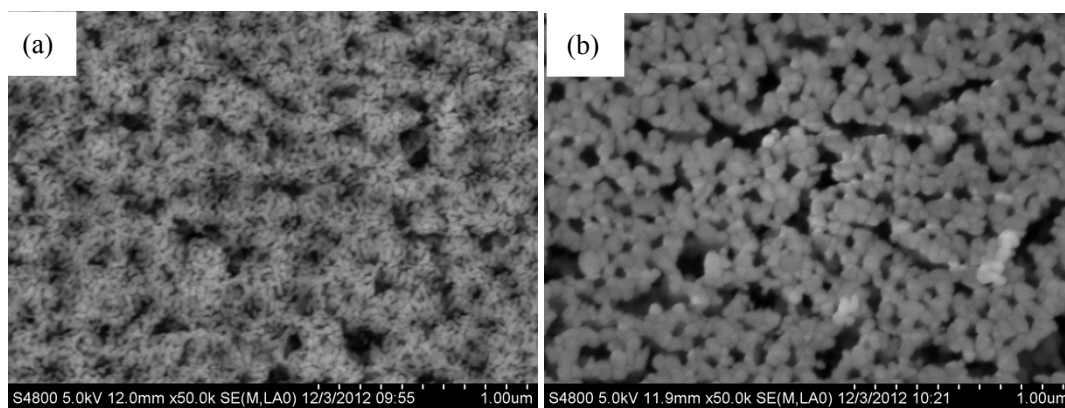

**Fig. S12** SEM images of porous  $\text{ZnCo}_2\text{O}_4$  (a) and porous  $\text{NiO}$  (b).

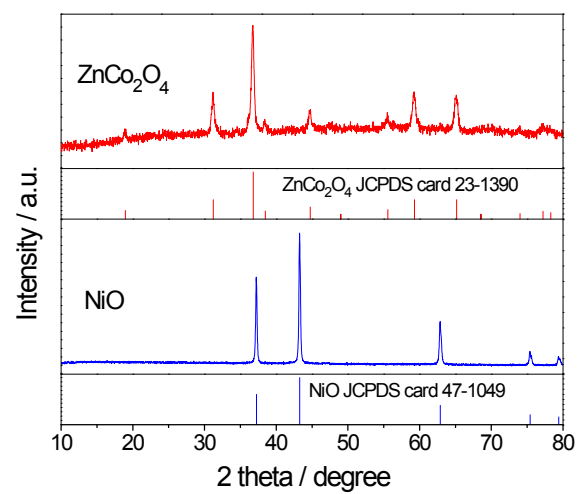

**Fig. S13** XRD patterns of porous  $\text{ZnCo}_2\text{O}_4$  and porous  $\text{NiO}$ .
